# Supplementary material
Source: HighWire-hosted journal article supplement (http://ajnr-stage2.highwire.org/highwire/filestream/95811/field_highwire_adjunct_files/0/0836.pdf)
Supplement: 0836.pdf [file 0836.pdf]

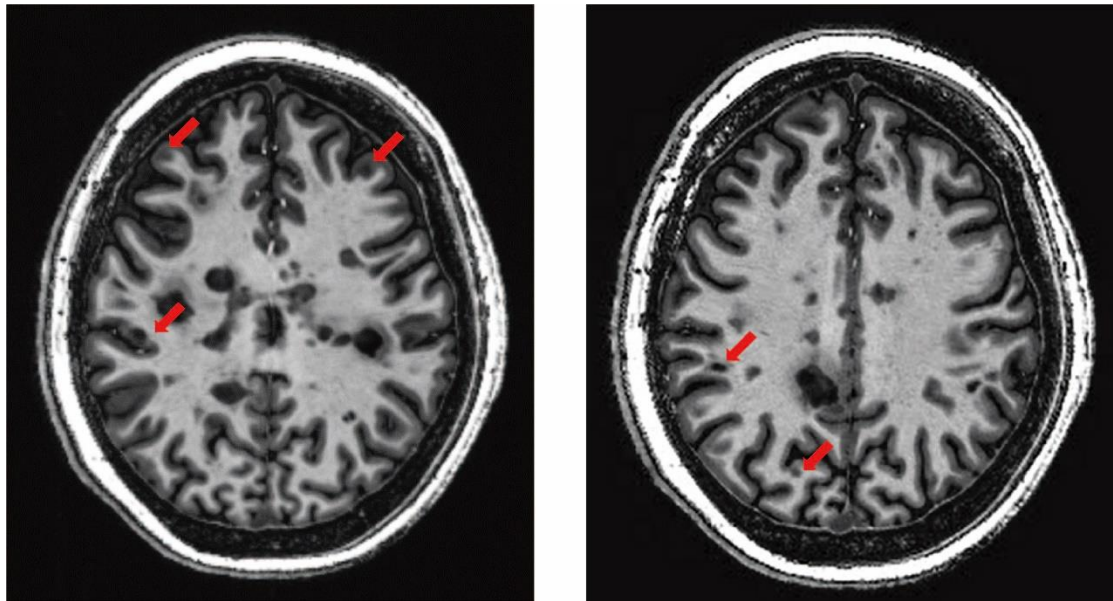

**Online Figure 1. Visualization of MS lesion involvement of the U-fibers in a typical patient acquired with MP2RAGE.** Red arrows indicate several lesions running through short-range fibers in the junctions of the cortex and white matter.
